# Supplementary material
Source: Springer Nature journal article supplement (https://www.springermedizin.de/resource/supplementary/13063_2011_634_MOESM1_ESM.pdf/9618898)

**Figure 1: CBT Study Flow Diagram**

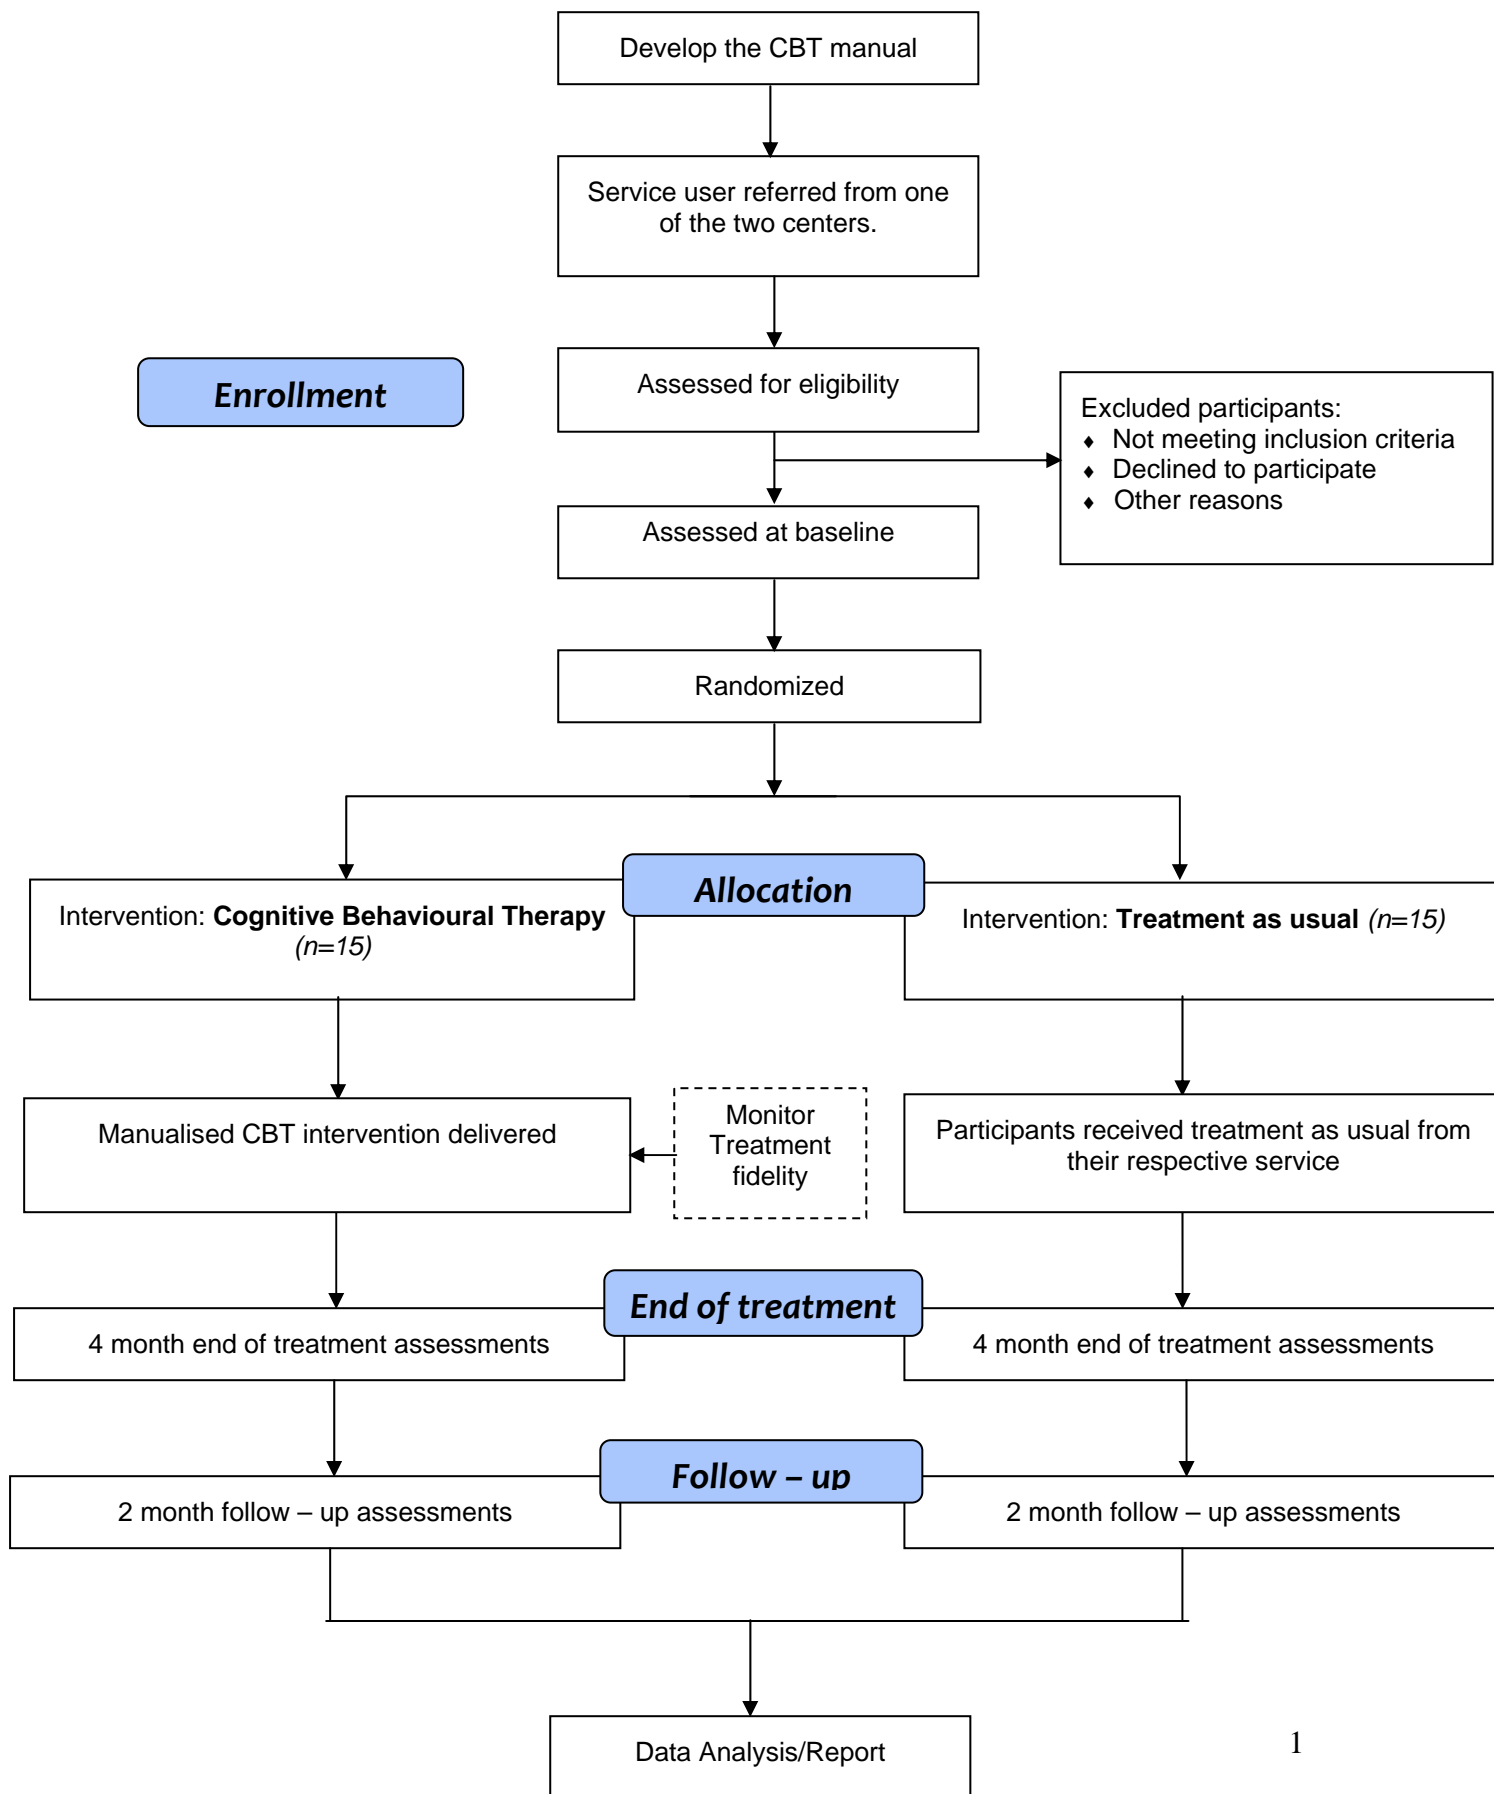

Supplement: MOESM1 [file 9618898]
